# Supplementary material for: Effect of a home-visiting parenting program to promote early childhood development and prevent violence: a cluster-randomized trial in Rwanda
Source: HighWire-hosted journal article supplement (doi:10.1136/bmjgh-2020-003508), 2021-01-01
Supplement: bmjgh-2020-003508supp001_data_supplement.pdf [file bmjgh-2020-003508supp001_data_supplement.pdf]

**Supplementary Table S1. The twelve *Sugira Muryango* modules**

- Module 1: Family Narrative (illuminating family strengths despite adversity)
- Module 2: The importance of early stimulation and play
- Module 3: Building early communication skills
- Module 4: The importance of good nutrition
- Module 5: The importance of good hygiene
- Module 6: The importance of good health
- Module 7: Managing the stresses of parenting and family life
- Module 8: Resolving conflicts in the home
- Module 9: The important role that everyone plays in raising a baby well
- Module 10: Good parenting is better than being born well
- Module 11: Making the home a place where a baby's brain can grow
- Module 12: With a united family, anything is possible
