# Supplementary material for: Effect of a home-visiting parenting program to promote early childhood development and prevent violence: a cluster-randomized trial in Rwanda
Source: HighWire-hosted journal article supplement (doi:10.1136/bmjgh-2020-003508), 2021-01-01
Supplement: bmjgh-2020-003508supp002_data_supplement.pdf [file bmjgh-2020-003508supp002_data_supplement.pdf]

**Supplementary Table S2: Community Based Coaches (CBCs): selection, training, supervision and incentives.**

- Selection criteria: a) Live in the beneficiary households they will deliver the intervention to; b) be Rwandan; c) Be aged 18 or older; d) be able to write, read, and count in Kinyarwanda, e) be committed to young children and family values f) have the required amount of time to carry out the *Sugira Muryango* intervention with a select number of households; g) be recommended and approved by local community and authorities
- Selected from the local community using a three-step process which involved nomination from community members, a phone screening and an intensive interview whereby applicants were given a curriculum vignette of a challenging family situation and explain the vignette, instructed to explain an image shown from the curriculum which depicted family unity, nutrition, father engagement, and early stimulation and a writing test to capture demographic information and answer brief questions to identify any prior experience they may have had delivering community based programs.
- Three-week training session delivered by trained supervisors.
- Training included role-play-based learning, active coaching practices (focused on identifying and reinforcing serve and return interactions between male and female caregivers), techniques for engaging fathers, strategies for providing feedback to caregivers on early stimulation, conflict resolution, problem solving, and resource navigation.
- Supervision provided by Sugira Muryango supervisors who had been involved in previous pilot work.
- Supervision took the form of in-person supervision of the CBCs during the first three weeks of the intervention, and each supervisor shadowed each CBC once in the home. Telephone supervision and peer support groups occurred weekly, and group supervision was held once a month.
- CBCs audiotaped the home-based sessions, which were reviewed by a supervisor for fidelity monitoring.

CBCs were stipend according to local practices (28,000 Rwandan Francs per month for a caseload of five families, visiting weekly for a period of three months).
