# Supplementary material for: Effect of a home-visiting parenting program to promote early childhood development and prevent violence: a cluster-randomized trial in Rwanda
Source: HighWire-hosted journal article supplement (doi:10.1136/bmjgh-2020-003508), 2021-01-01
Supplement: bmjgh-2020-003508supp004_data_supplement.pdf [file bmjgh-2020-003508supp004_data_supplement.pdf]

**Supplementary Table S4: Estimated Intra-Class Correlations from Null Models for main outcomes<sup>1</sup>**

| Outcome                                        | Intra-Class Correlation Estimate |
|------------------------------------------------|----------------------------------|
| <b>Child development outcomes</b>              |                                  |
| ASQ-3 Gross motor z-score                      | 0.037                            |
| ASQ-3 Fine Motor z- score                      | 0.017                            |
| ASQ-3 Communication z- score                   | 0.027                            |
| ASQ-3 Prob. Solving z- score                   | 0.027                            |
| ASQ-3 Social Emotional z- score                | 0.015                            |
| MDAT Gross motor z- score                      | 0.029                            |
| MDAT fine motor z- score                       | 0.033                            |
| MDAT language z- score                         | 0.040                            |
| MDAT socioemotional z- score                   | 0.028                            |
| <b>Father Engagement</b>                       |                                  |
| Father engagement in childcare <sup>2</sup>    | 0.117                            |
| <b>Child growth outcomes</b>                   |                                  |
| Height-for-age (HAZ)                           | 0.050                            |
| Weight-for-age (WAZ)                           | 0.029                            |
| Weight-for-height (WHZ)                        | 0.033                            |
| Middle upper arm circumference (MUAC)          | 0.063                            |
| <b>Violence and safety</b>                     |                                  |
| Harsh discipline (MICS4) <sup>3</sup>          | 0.029                            |
| Victimization (female caregivers) <sup>4</sup> | 0.001                            |
| Perpetration (male caregivers) <sup>5</sup>    | 0.001                            |

ASQ-3=Agnes and Stages Questionnaire; MDAT=Malawi Developmental Assessment Tool

1: ICC estimates for Negative Binomial models were computed based on Leckie G, Browne WJ, Goldstein H, Merlo J, Austin PC. Partitioning variation in multilevel models for count data. *Psychol Methods*. 2020 Apr 20. doi: 10.1037/met0000265. Epub ahead of print. PMID: 32309962. Results should be interpreted with caution given there is no generally accepted way of estimating ICCs for count models, and this is an ongoing discussion.

2: Among households with a father (N=524)

3: MICS: UNICEF's Multiple Indicator Cluster Survey

4: Among female caregivers reporting a current intimate partner at baseline (N=523)

5: Among male caregivers reporting a current intimate partner at baseline (N=450)
